# Supplementary material
Source: PubMed Central journal article supplement (PMC3852416)
Supplement: NIHMS478679-supplement-supplement_1.pdf [file NIHMS478679-supplement-supplement_1.pdf]

## ONLINE APPENDICES

**Appendix S1:** Sampling locations and numbers of threespine stickleback included in the analysis.

| Watershed   | Population | Code | <i>N</i> | Latitude (N) | Longitude (W) |
|-------------|------------|------|----------|--------------|---------------|
| Misty       | Lake       | ML   | 40       | 50°36'16"    | 127°15'42"    |
|             | Inlet      | MI   | 36       | 50°36'8"     | 127°15'5"     |
| Beaver      | Lake       | Bel  | 40       | 50°35'59"    | 127°19'11"    |
|             | Outlet     | BeO  | 37       | 50°36'       | 127°19'33"    |
| Roberts     | Lake       | RL   | 37       | 50°13'37"    | 125°33'13"    |
|             | Outlet     | RO   | 40       | 50°13'40"    | 125°33'24"    |
| Pye         | Lake       | PL   | 40       | 50°18'9"     | 125°35'27"    |
|             | Outlet     | PO   | 40       | 50°18'11"    | 125°35'23"    |
| Village Bay | Lake       | VL   | 40       | 50°8'32"     | 125°11'36"    |
|             | Inlet      | VI   | 40       | 50°8'31"     | 125°11'42"    |
| Boot        | Lake       | BL   | 40       | 50°3'        | 125°32'27"    |
|             | Outlet     | BO   | 40       | 50°2'54"     | 125°32'45"    |

**Appendix S2:** Numbers of individuals from each population classified into the population of origin, parapatric populations in a different habitat, and allopatric populations in similar or different habitat.

| Traits                     | Focal population       | Origin     | Parapatric        | Allopatric      |                   | N  |
|----------------------------|------------------------|------------|-------------------|-----------------|-------------------|----|
|                            |                        |            | Different habitat | Similar habitat | Divergent habitat |    |
| <b>Armor traits</b>        | Mistv lake             | 9          | 4                 | 18              | 9                 | 40 |
|                            | Misty stream           | 9          | 3                 | 6               | 18                | 36 |
|                            | Beaver Lake            | 31         | 3                 | 0               | 6                 | 40 |
|                            | Beaver stream          | 2          | 8                 | 9               | 18                | 37 |
|                            | Roberts lake           | 8          | 2                 | 14              | 13                | 37 |
|                            | Roberts stream         | 7          | 0                 | 11              | 22                | 40 |
|                            | Pye Lake               | 10         | 0                 | 21              | 8                 | 40 |
|                            | Pye stream             | 3          | 7                 | 12              | 18                | 40 |
|                            | Village bay lake       | 7          | 1                 | 18              | 14                | 40 |
|                            | Village bay stream     | 5          | 1                 | 11              | 23                | 40 |
|                            | Boot lake              | 15         | 2                 | 16              | 6                 | 40 |
|                            | Boot stream            | 17         | 0                 | 8               | 15                | 40 |
|                            | <b>Foraging traits</b> | Misty lake | 5                 | 2               | 27                | 6  |
| Misty stream               |                        | 14         | 2                 | 11              | 9                 | 36 |
| Beaver Lake                |                        | 8          | 0                 | 6               | 26                | 40 |
| Beaver stream              |                        | 1          | 4                 | 26              | 6                 | 37 |
| Roberts lake               |                        | 1          | 5                 | 22              | 9                 | 37 |
| Roberts stream             |                        | 7          | 5                 | 15              | 13                | 40 |
| Pye Lake                   |                        | 15         | 1                 | 18              | 5                 | 40 |
| Pye stream                 |                        | 15         | 0                 | 14              | 11                | 40 |
| Village bay lake           |                        | 13         | 1                 | 22              | 4                 | 40 |
| Village bay stream         |                        | 6          | 2                 | 25              | 7                 | 40 |
| Boot lake                  |                        | 12         | 0                 | 21              | 6                 | 40 |
| Boot stream                |                        | 11         | 0                 | 19              | 10                | 40 |
| <b>Ecological measures</b> |                        | Misty lake | 17                | 1               | 11                | 11 |
|                            | Misty stream           | 19         | 0                 | 13              | 4                 | 36 |
|                            | Beaver Lake            | 29         | 0                 | 9               | 2                 | 40 |
|                            | Beaver stream          | 27         | 1                 | 7               | 2                 | 37 |
|                            | Roberts lake           | 14         | 0                 | 19              | 4                 | 37 |
|                            | Roberts stream         | 8          | 0                 | 10              | 22                | 40 |
|                            | Pye Lake               | 28         | 0                 | 11              | 0                 | 40 |
|                            | Pye stream             | 17         | 1                 | 2               | 20                | 40 |
|                            | Village bay lake       | 18         | 1                 | 4               | 17                | 40 |
|                            | Village bay stream     | 32         | 1                 | 7               | 0                 | 40 |
|                            | Boot lake              | 8          | 0                 | 25              | 6                 | 40 |
|                            | Boot stream            | 24         | 0                 | 11              | 5                 | 40 |
|                            | <b>Neutral markers</b> | Misty lake | 33                | 0               | 5                 | 1  |
| Misty stream               |                        | 36         | 0                 | 0               | 0                 | 36 |
| Beaver Lake                |                        | 40         | 0                 | 0               | 0                 | 40 |
| Beaver stream              |                        | 35         | 0                 | 0               | 2                 | 37 |
| Roberts lake               |                        | 30         | 2                 | 4               | 1                 | 37 |
| Roberts stream             |                        | 33         | 5                 | 0               | 2                 | 40 |
| Pye Lake                   |                        | 34         | 3                 | 2               | 0                 | 40 |
| Pye stream                 |                        | 32         | 4                 | 0               | 4                 | 40 |
| Village bay lake           |                        | 24         | 7                 | 7               | 2                 | 40 |
| Village bay stream         |                        | 35         | 5                 | 0               | 0                 | 40 |
| Boot lake                  |                        | 38         | 0                 | 1               | 0                 | 40 |
| Boot stream                |                        | 40         | 0                 | 0               | 0                 | 40 |
| <b>Non-neutral markers</b> |                        | Misty lake | 33                | 1               | 4                 | 1  |
|                            | Misty stream           | 35         | 0                 | 1               | 0                 | 36 |
|                            | Beaver Lake            | 40         | 0                 | 0               | 0                 | 40 |
|                            | Beaver stream          | 36         | 0                 | 0               | 1                 | 37 |
|                            | Roberts lake           | 29         | 1                 | 6               | 1                 | 37 |
|                            | Roberts stream         | 32         | 6                 | 1               | 1                 | 40 |
|                            | Pye Lake               | 38         | 0                 | 1               | 0                 | 40 |
|                            | Pye stream             | 40         | 0                 | 0               | 0                 | 40 |
|                            | Village bay lake       | 31         | 8                 | 1               | 0                 | 40 |
|                            | Village bay stream     | 37         | 3                 | 0               | 0                 | 40 |
|                            | Boot lake              | 37         | 0                 | 1               | 1                 | 40 |
|                            | Boot stream            | 40         | 0                 | 0               | 0                 | 40 |

**Appendix S3:** Numbers of individuals cross-classified into each category (parapatric different, allopatric similar, and allopatric different) and the total number cross-classified. This total number is sometimes less than the number of individuals classified (Appendix S2) because in some cases the probability of classification to the population of origin was 100%.

| Traits                     | Parapatric             |                 | Allopatric        |    | N  |
|----------------------------|------------------------|-----------------|-------------------|----|----|
|                            | Different habitat      | Similar habitat | Different habitat |    |    |
| <b>Armor traits</b>        | 4                      | 19              | 17                |    | 40 |
|                            | 3                      | 11              | 22                |    | 36 |
|                            | 3                      | 1               | 36                |    | 40 |
|                            | 8                      | 11              | 18                |    | 37 |
|                            | 2                      | 16              | 19                |    | 37 |
|                            | 0                      | 11              | 29                |    | 40 |
|                            | 0                      | 28              | 12                |    | 40 |
|                            | 7                      | 14              | 19                |    | 40 |
|                            | 1                      | 20              | 19                |    | 40 |
|                            | 1                      | 12              | 27                |    | 40 |
|                            | 2                      | 26              | 12                |    | 40 |
|                            | 0                      | 9               | 31                |    | 40 |
|                            | <b>Foraging traits</b> | 2               | 31                | 7  |    |
| 2                          |                        | 18              | 16                |    | 36 |
| 0                          |                        | 6               | 34                |    | 40 |
| 4                          |                        | 27              | 6                 |    | 37 |
| 5                          |                        | 22              | 10                |    | 37 |
| 5                          |                        | 15              | 20                |    | 40 |
| 1                          |                        | 34              | 5                 |    | 40 |
| 0                          |                        | 17              | 23                |    | 40 |
| 1                          |                        | 33              | 6                 |    | 40 |
| 2                          |                        | 31              | 7                 |    | 40 |
| <b>Ecological measures</b> | 0                      | 33              | 7                 |    | 40 |
|                            | 0                      | 30              | 10                |    | 40 |
|                            | 1                      | 20              | 19                |    | 40 |
|                            | 0                      | 31              | 5                 |    | 36 |
|                            | 0                      | 16              | 24                |    | 40 |
|                            | 2                      | 20              | 15                |    | 37 |
|                            | 0                      | 33              | 4                 |    | 37 |
|                            | 0                      | 11              | 29                |    | 40 |
|                            | 0                      | 40              | 0                 |    | 40 |
|                            | 1                      | 6               | 33                |    | 40 |
| <b>Neutral markers</b>     | 1                      | 5               | 34                |    | 40 |
|                            | 1                      | 38              | 1                 |    | 40 |
|                            | 0                      | 27              | 13                |    | 40 |
|                            | 0                      | 34              | 6                 |    | 40 |
|                            | 1                      | 11              | 9                 |    | 21 |
|                            | 3                      | 0               | 1                 |    | 4  |
|                            | 0                      | 0               | 0                 |    | 0  |
|                            | 1                      | 0               | 21                |    | 22 |
|                            | 10                     | 13              | 7                 |    | 30 |
|                            | 14                     | 0               | 7                 |    | 21 |
| <b>Non-neutral markers</b> | 13                     | 9               | 0                 |    | 22 |
|                            | 13                     | 1               | 6                 |    | 20 |
|                            | 15                     | 19              | 4                 |    | 38 |
|                            | 26                     | 0               | 0                 |    | 26 |
|                            | 8                      | 2               | 1                 |    | 11 |
|                            | 11                     | 0               | 1                 |    | 12 |
|                            | 1                      | 11              | 2                 |    | 14 |
|                            | 0                      | 1               | 0                 |    | 1  |
|                            | 0                      | 1               | 0                 |    | 1  |
|                            | 0                      | 0               | 1                 |    | 1  |
| 3                          | 15                     | 1               |                   | 19 |    |
| 10                         | 5                      | 1               |                   | 16 |    |
| 0                          | 9                      | 0               |                   | 9  |    |
| 0                          | 0                      | 0               |                   | 0  |    |
| 15                         | 2                      | 0               |                   | 17 |    |
| 9                          | 0                      | 0               |                   | 9  |    |
| 0                          | 2                      | 1               |                   | 3  |    |
| 0                          | 0                      | 0               |                   | 0  |    |
